# Supplementary material for: Exotic and native plants play equally important roles in supporting and structuring plant-hummingbird networks within urban green spaces
Source: PeerJ. 2024 Feb 21;12:e16996. doi: 10.7717/peerj.16996 (PMC10893870; doi:10.7717/peerj.16996)
Supplement: Supplemental Information 1 [file peerj-12-16996-s001.xlsx]

## Sheet: Flower abundance
Plant species	Flower abundance	Month	Type
Abutilon pictum	16	January	Exotic
Abutilon pictum	26	February	Exotic
Abutilon pictum	42	March	Exotic
Abutilon pictum	33	April	Exotic
Abutilon pictum	9	May	Exotic
Abutilon pictum	0	June	Exotic
Abutilon pictum	0	July	Exotic
Abutilon pictum	0	August	Exotic
Abutilon pictum	0	September	Exotic
Abutilon pictum	0	October	Exotic
Abutilon pictum	0	November	Exotic
Abutilon pictum	8	December	Exotic
Bouvardia ternifolia	158	January	Native
Bouvardia ternifolia	336	February	Native
Bouvardia ternifolia	598	March	Native
Bouvardia ternifolia	129	April	Native
Bouvardia ternifolia	0	May	Native
Bouvardia ternifolia	0	June	Native
Bouvardia ternifolia	0	July	Native
Bouvardia ternifolia	0	August	Native
Bouvardia ternifolia	0	September	Native
Bouvardia ternifolia	0	October	Native
Bouvardia ternifolia	0	November	Native
Bouvardia ternifolia	0	December	Native
Citrus reticulata	0	January	Exotic
Citrus reticulata	0	February	Exotic
Citrus reticulata	0	March	Exotic
Citrus reticulata	0	April	Exotic
Citrus reticulata	0	May	Exotic
Citrus reticulata	0	June	Exotic
Citrus reticulata	0	July	Exotic
Citrus reticulata	178	August	Exotic
Citrus reticulata	258	September	Exotic
Citrus reticulata	489	October	Exotic
Citrus reticulata	127	November	Exotic
Citrus reticulata	0	December	Exotic
Crocosmia x crocosmiiflora	0	January	Exotic
Crocosmia x crocosmiiflora	46	February	Exotic
Crocosmia x crocosmiiflora	72	March	Exotic
Crocosmia x crocosmiiflora	49	April	Exotic
Crocosmia x crocosmiiflora	28	May	Exotic
Crocosmia x crocosmiiflora	0	June	Exotic
Crocosmia x crocosmiiflora	0	July	Exotic
Crocosmia x crocosmiiflora	0	August	Exotic
Crocosmia x crocosmiiflora	0	September	Exotic
Crocosmia x crocosmiiflora	0	October	Exotic
Crocosmia x crocosmiiflora	0	November	Exotic
Crocosmia x crocosmiiflora	0	December	Exotic
Cydonia oblonga	0	January	Exotic
Cydonia oblonga	38	February	Exotic
Cydonia oblonga	163	March	Exotic
Cydonia oblonga	126	April	Exotic
Cydonia oblonga	42	May	Exotic
Cydonia oblonga	0	June	Exotic
Cydonia oblonga	0	July	Exotic
Cydonia oblonga	0	August	Exotic
Cydonia oblonga	0	September	Exotic
Cydonia oblonga	0	October	Exotic
Cydonia oblonga	0	November	Exotic
Cydonia oblonga	0	December	Exotic
Cylindropuntia imbricata	82	January	Native
Cylindropuntia imbricata	9	February	Native
Cylindropuntia imbricata	0	March	Native
Cylindropuntia imbricata	0	April	Native
Cylindropuntia imbricata	0	May	Native
Cylindropuntia imbricata	0	June	Native
Cylindropuntia imbricata	0	July	Native
Cylindropuntia imbricata	0	August	Native
Cylindropuntia imbricata	0	September	Native
Cylindropuntia imbricata	0	October	Native
Cylindropuntia imbricata	19	November	Native
Cylindropuntia imbricata	38	December	Native
Grevillea robusta	379	January	Exotic
Grevillea robusta	130	February	Exotic
Grevillea robusta	0	March	Exotic
Grevillea robusta	0	April	Exotic
Grevillea robusta	0	May	Exotic
Grevillea robusta	0	June	Exotic
Grevillea robusta	0	July	Exotic
Grevillea robusta	0	August	Exotic
Grevillea robusta	0	September	Exotic
Grevillea robusta	0	October	Exotic
Grevillea robusta	82	November	Exotic
Grevillea robusta	168	December	Exotic
Impatiens balfourii	139	January	Exotic
Impatiens balfourii	261	February	Exotic
Impatiens balfourii	85	March	Exotic
Impatiens balfourii	39	April	Exotic
Impatiens balfourii	8	May	Exotic
Impatiens balfourii	0	June	Exotic
Impatiens balfourii	0	July	Exotic
Impatiens balfourii	0	August	Exotic
Impatiens balfourii	0	September	Exotic
Impatiens balfourii	0	October	Exotic
Impatiens balfourii	41	November	Exotic
Impatiens balfourii	59	December	Exotic
Jacaranda mimosifolia	723	January	Exotic
Jacaranda mimosifolia	938	February	Exotic
Jacaranda mimosifolia	521	March	Exotic
Jacaranda mimosifolia	341	April	Exotic
Jacaranda mimosifolia	219	May	Exotic
Jacaranda mimosifolia	0	June	Exotic
Jacaranda mimosifolia	0	July	Exotic
Jacaranda mimosifolia	0	August	Exotic
Jacaranda mimosifolia	0	September	Exotic
Jacaranda mimosifolia	0	October	Exotic
Jacaranda mimosifolia	115	November	Exotic
Jacaranda mimosifolia	429	December	Exotic
Jasminum grandiflorum	39	January	Exotic
Jasminum grandiflorum	89	February	Exotic
Jasminum grandiflorum	428	March	Exotic
Jasminum grandiflorum	159	April	Exotic
Jasminum grandiflorum	0	May	Exotic
Jasminum grandiflorum	0	June	Exotic
Jasminum grandiflorum	0	July	Exotic
Jasminum grandiflorum	0	August	Exotic
Jasminum grandiflorum	0	September	Exotic
Jasminum grandiflorum	0	October	Exotic
Jasminum grandiflorum	0	November	Exotic
Jasminum grandiflorum	0	December	Exotic
Kniphofia linearifolia	382	January	Exotic
Kniphofia linearifolia	126	February	Exotic
Kniphofia linearifolia	0	March	Exotic
Kniphofia linearifolia	0	April	Exotic
Kniphofia linearifolia	0	May	Exotic
Kniphofia linearifolia	0	June	Exotic
Kniphofia linearifolia	0	July	Exotic
Kniphofia linearifolia	0	August	Exotic
Kniphofia linearifolia	0	September	Exotic
Kniphofia linearifolia	0	October	Exotic
Kniphofia linearifolia	91	November	Exotic
Kniphofia linearifolia	237	December	Exotic
Malus domestica	0	January	Exotic
Malus domestica	0	February	Exotic
Malus domestica	0	March	Exotic
Malus domestica	0	April	Exotic
Malus domestica	0	May	Exotic
Malus domestica	0	June	Exotic
Malus domestica	0	July	Exotic
Malus domestica	0	August	Exotic
Malus domestica	0	September	Exotic
Malus domestica	0	October	Exotic
Malus domestica	128	November	Exotic
Malus domestica	359	December	Exotic
Melaleuca citrina	0	January	Exotic
Melaleuca citrina	0	February	Exotic
Melaleuca citrina	0	March	Exotic
Melaleuca citrina	37	April	Exotic
Melaleuca citrina	127	May	Exotic
Melaleuca citrina	459	June	Exotic
Melaleuca citrina	231	July	Exotic
Melaleuca citrina	58	August	Exotic
Melaleuca citrina	0	September	Exotic
Melaleuca citrina	0	October	Exotic
Melaleuca citrina	0	November	Exotic
Melaleuca citrina	0	December	Exotic
Nerium oleander	128	January	Exotic
Nerium oleander	231	February	Exotic
Nerium oleander	453	March	Exotic
Nerium oleander	398	April	Exotic
Nerium oleander	131	May	Exotic
Nerium oleander	0	June	Exotic
Nerium oleander	0	July	Exotic
Nerium oleander	0	August	Exotic
Nerium oleander	0	September	Exotic
Nerium oleander	0	October	Exotic
Nerium oleander	0	November	Exotic
Nerium oleander	0	December	Exotic
Nicotiana glauca	245	January	Exotic
Nicotiana glauca	189	February	Exotic
Nicotiana glauca	267	March	Exotic
Nicotiana glauca	106	April	Exotic
Nicotiana glauca	247	May	Exotic
Nicotiana glauca	589	June	Exotic
Nicotiana glauca	451	July	Exotic
Nicotiana glauca	389	August	Exotic
Nicotiana glauca	245	September	Exotic
Nicotiana glauca	211	October	Exotic
Nicotiana glauca	135	November	Exotic
Nicotiana glauca	89	December	Exotic
Oenothera elata	0	January	Native
Oenothera elata	0	February	Native
Oenothera elata	82	March	Native
Oenothera elata	217	April	Native
Oenothera elata	395	May	Native
Oenothera elata	125	June	Native
Oenothera elata	0	July	Native
Oenothera elata	0	August	Native
Oenothera elata	0	September	Native
Oenothera elata	0	October	Native
Oenothera elata	0	November	Native
Oenothera elata	0	December	Native
Opuntia robusta	48	January	Native
Opuntia robusta	0	February	Native
Opuntia robusta	0	March	Native
Opuntia robusta	0	April	Native
Opuntia robusta	0	May	Native
Opuntia robusta	0	June	Native
Opuntia robusta	0	July	Native
Opuntia robusta	0	August	Native
Opuntia robusta	0	September	Native
Opuntia robusta	0	October	Native
Opuntia robusta	14	November	Native
Opuntia robusta	27	December	Native
Pittocaulon praecox	184	January	Native
Pittocaulon praecox	0	February	Native
Pittocaulon praecox	0	March	Native
Pittocaulon praecox	0	April	Native
Pittocaulon praecox	0	May	Native
Pittocaulon praecox	0	June	Native
Pittocaulon praecox	0	July	Native
Pittocaulon praecox	0	August	Native
Pittocaulon praecox	0	September	Native
Pittocaulon praecox	0	October	Native
Pittocaulon praecox	93	November	Native
Pittocaulon praecox	321	December	Native
Prunus domestica	0	January	Exotic
Prunus domestica	0	February	Exotic
Prunus domestica	0	March	Exotic
Prunus domestica	0	April	Exotic
Prunus domestica	0	May	Exotic
Prunus domestica	0	June	Exotic
Prunus domestica	0	July	Exotic
Prunus domestica	0	August	Exotic
Prunus domestica	0	September	Exotic
Prunus domestica	0	October	Exotic
Prunus domestica	148	November	Exotic
Prunus domestica	458	December	Exotic
Prunus persica	0	January	Exotic
Prunus persica	0	February	Exotic
Prunus persica	0	March	Exotic
Prunus persica	0	April	Exotic		452
Prunus persica	0	May	Exotic		931
Prunus persica	0	June	Exotic		0
Prunus persica	0	July	Exotic		0
Prunus persica	0	August	Exotic		1383
Prunus persica	162	September	Exotic
Prunus persica	385	October	Exotic
Prunus persica	0	November	Exotic
Prunus persica	0	December	Exotic
Prunus serotina	0	January	Native
Prunus serotina	0	February	Native
Prunus serotina	0	March	Native
Prunus serotina	0	April	Native
Prunus serotina	0	May	Native
Prunus serotina	0	June	Native
Prunus serotina	0	July	Native
Prunus serotina	0	August	Native
Prunus serotina	452	September	Native
Prunus serotina	931	October	Native
Prunus serotina	0	November	Native
Prunus serotina	0	December	Native
Psittacanthus calyculatus	0	January	Native
Psittacanthus calyculatus	182	February	Native
Psittacanthus calyculatus	342	March	Native
Psittacanthus calyculatus	463	April	Native
Psittacanthus calyculatus	883	May	Native
Psittacanthus calyculatus	782	June	Native
Psittacanthus calyculatus	623	July	Native
Psittacanthus calyculatus	0	August	Native
Psittacanthus calyculatus	0	September	Native
Psittacanthus calyculatus	0	October	Native
Psittacanthus calyculatus	0	November	Native
Psittacanthus calyculatus	0	December	Native
Punica granatum	62	January	Exotic
Punica granatum	97	February	Exotic
Punica granatum	134	March	Exotic
Punica granatum	231	April	Exotic
Punica granatum	0	May	Exotic
Punica granatum	0	June	Exotic
Punica granatum	0	July	Exotic
Punica granatum	0	August	Exotic
Punica granatum	0	September	Exotic
Punica granatum	0	October	Exotic
Punica granatum	0	November	Exotic
Punica granatum	0	December	Exotic
Pyrus communis	0	January	Exotic
Pyrus communis	0	February	Exotic
Pyrus communis	0	March	Exotic
Pyrus communis	0	April	Exotic
Pyrus communis	0	May	Exotic
Pyrus communis	0	June	Exotic
Pyrus communis	0	July	Exotic
Pyrus communis	0	August	Exotic
Pyrus communis	237	September	Exotic
Pyrus communis	521	October	Exotic
Pyrus communis	0	November	Exotic
Pyrus communis	0	December	Exotic
Rubus ulmifolius	341	January	Exotic
Rubus ulmifolius	0	February	Exotic
Rubus ulmifolius	0	March	Exotic
Rubus ulmifolius	0	April	Exotic
Rubus ulmifolius	0	May	Exotic
Rubus ulmifolius	0	June	Exotic
Rubus ulmifolius	0	July	Exotic
Rubus ulmifolius	0	August	Exotic
Rubus ulmifolius	0	September	Exotic
Rubus ulmifolius	0	October	Exotic
Rubus ulmifolius	0	November	Exotic
Rubus ulmifolius	156	December	Exotic
Tecoma stans	0	January	Native
Tecoma stans	0	February	Native
Tecoma stans	52	March	Native
Tecoma stans	219	April	Native
Tecoma stans	118	May	Native
Tecoma stans	0	June	Native
Tecoma stans	0	July	Native
Tecoma stans	0	August	Native
Tecoma stans	0	September	Native
Tecoma stans	0	October	Native
Tecoma stans	0	November	Native
Tecoma stans	0	December	Native
Tulbaghia violacea	134	January	Exotic
Tulbaghia violacea	218	February	Exotic
Tulbaghia violacea	321	March	Exotic
Tulbaghia violacea	178	April	Exotic
Tulbaghia violacea	81	May	Exotic
Tulbaghia violacea	0	June	Exotic
Tulbaghia violacea	0	July	Exotic
Tulbaghia violacea	0	August	Exotic
Tulbaghia violacea	0	September	Exotic
Tulbaghia violacea	0	October	Exotic
Tulbaghia violacea	0	November	Exotic
Tulbaghia violacea	65	December	Exotic
Verbascum virgatum	0	January	Exotic
Verbascum virgatum	58	February	Exotic
Verbascum virgatum	106	March	Exotic
Verbascum virgatum	262	April	Exotic
Verbascum virgatum	137	May	Exotic
Verbascum virgatum	81	June	Exotic
Verbascum virgatum	0	July	Exotic
Verbascum virgatum	0	August	Exotic
Verbascum virgatum	0	September	Exotic
Verbascum virgatum	0	October	Exotic
Verbascum virgatum	0	November	Exotic
Verbascum virgatum	0	December	Exotic

## Sheet: Hummingbird abundance
Species	Abundance	Month
Saucerottia beryllina	51	January
Saucerottia beryllina	44	February
Saucerottia beryllina	25	March
Saucerottia beryllina	15	April
Saucerottia beryllina	18	May
Saucerottia beryllina	9	June
Saucerottia beryllina	12	July
Saucerottia beryllina	10	August
Saucerottia beryllina	8	September
Saucerottia beryllina	12	October
Saucerottia beryllina	18	November
Saucerottia beryllina	33	December
Amazilia violiceps	9	January
Amazilia violiceps	21	February
Amazilia violiceps	16	March
Amazilia violiceps	22	April
Amazilia violiceps	13	May
Amazilia violiceps	16	June
Amazilia violiceps	8	July
Amazilia violiceps	2	August
Amazilia violiceps	6	September
Amazilia violiceps	10	October
Amazilia violiceps	14	November
Amazilia violiceps	15	December
Archilochus colubris	13	January
Archilochus colubris	18	February
Archilochus colubris	22	March
Archilochus colubris	16	April
Archilochus colubris	11	May
Archilochus colubris	8	June
Archilochus colubris	12	July
Archilochus colubris	3	August
Archilochus colubris	8	September
Archilochus colubris	6	October
Archilochus colubris	11	November
Archilochus colubris	28	December
Atthis heloisa	4	January
Atthis heloisa	6	February
Atthis heloisa	2	March
Atthis heloisa	1	April
Atthis heloisa	1	May
Atthis heloisa	0	June
Atthis heloisa	0	July
Atthis heloisa	0	August
Atthis heloisa	2	September
Atthis heloisa	1	October
Atthis heloisa	3	November
Atthis heloisa	4	December
Calothorax lucifer	11	January
Calothorax lucifer	17	February
Calothorax lucifer	12	March
Calothorax lucifer	10	April
Calothorax lucifer	8	May
Calothorax lucifer	7	June
Calothorax lucifer	0	July
Calothorax lucifer	0	August
Calothorax lucifer	0	September
Calothorax lucifer	0	October
Calothorax lucifer	0	November
Calothorax lucifer	8	December
Cynanthus latirostris	9	January
Cynanthus latirostris	22	February
Cynanthus latirostris	14	March
Cynanthus latirostris	17	April
Cynanthus latirostris	21	May
Cynanthus latirostris	18	June
Cynanthus latirostris	11	July
Cynanthus latirostris	15	August
Cynanthus latirostris	9	September
Cynanthus latirostris	13	October
Cynanthus latirostris	23	November
Cynanthus latirostris	16	December
Basilinna leucotis	33	January
Basilinna leucotis	18	February
Basilinna leucotis	22	March
Basilinna leucotis	19	April
Basilinna leucotis	32	May
Basilinna leucotis	21	June
Basilinna leucotis	12	July
Basilinna leucotis	17	August
Basilinna leucotis	13	September
Basilinna leucotis	10	October
Basilinna leucotis	18	November
Basilinna leucotis	23	December
Lampornis clemenciae	11	January
Lampornis clemenciae	7	February
Lampornis clemenciae	9	March
Lampornis clemenciae	6	April
Lampornis clemenciae	7	May
Lampornis clemenciae	11	June
Lampornis clemenciae	0	July
Lampornis clemenciae	0	August
Lampornis clemenciae	0	September
Lampornis clemenciae	0	October
Lampornis clemenciae	0	November
Lampornis clemenciae	8	December

## Sheet: GC analysis
Plants					Hummingbirds
Core species	Gc value	Peripheral species	Gc value		Core species	Gc value	Peripheral species	Gc value
Psitta. cals	1.36	Tec. sta	0.87		Basilinna leucotis	1.57	Archilochus colubris	0.28
Pit. para	1.36	Pru. ser	0.87		Cynanthus latirostris	1.09	Saucerottia beryllina	0.44
Nic. gla	1.36	Pun. gra	0.38				Lampornis clemenciae	-0.68
Mel. cit	1.36	Ner. ole	0.38				Leucolia violiceps	-0.68
Jac. mim	1.36	Kni. lin	0.38				Selasphorus heloisa	-0.84
Gre. rob	1.36	Pru. per	-0.1				Calothorax lucifer	-1.17
Bou. ter	1.36	Pru. dom	-0.1
		Rub. ulm	-0.59
		Pyr. com	-0.59
		Opu. rob	-0.59
		Oen. ela	-0.59
		Jas. Gra	-0.59
		Imp. bal	-0.59
		Cros. cro	-0.59
		Ver. virg	-1.08
		Tul. viol	-1.08
		Mal. dom	-1.08
		Cyl. im	-1.08
		Cyd. obl	-1.08

## Sheet: Hummingbird visits and PI
Species	Life form	Type	Visits	Flower abundance	Relative visit proportion	Relative flower abundance	Preference index	Rank
Abutilon pictum (Gillies ex Hook.) Walp.	Evergreen shrub	Exótica	49	134	0.0104835	0.00508038	2.06353	7
Bouvardia ternifolia Schltdl.	Perennial shrub	Nativa	469	1221	0.100342	0.0462921	2.16759	5
Citrus reticulata Blanco	Perennial tree	Exótica	19	1052	0.00406504	0.0398847	0.10192	28
Crocosmia crocosmiiflora (G.Nicholson) N.E.Br.	Perennial herb	Exótica	59	195	0.012623	0.00739308	1.70741	10
Cydonia oblonga Mill.	Deciduous tree	Exótica	60	369	0.012837	0.01399	0.917582	15
Cylindropuntia imbricata (Haw.) F.M.Knuth	Perennial cactus	Nativa	48	148	0.0102696	0.00561116	1.83021	8
Grevillea robusta A.Cunn. ex R.Br.	Evergreen tree	Exótica	285	759	0.0609756	0.0287762	2.11896	6
Impatiens balfourii Hook.f.	Perennial herb	Exótica	66	632	0.0141207	0.0239612	0.589314	20
Jacaranda mimosifolia D.Don	Deciduous tree	Exótica	164	3286	0.0350877	0.124583	0.281641	26
Jasminum grandiflorum L.	Evrergreen shrub	Exótica	137	715	0.0293111	0.027108	1.08127	12
Kniphofia linearifolia Baker	Perennial herb	Exótica	136	836	0.0290971	0.0316955	0.918022	14
Malus domestica (Suckow) Borkh.	Deciduous tree	Exótica	38	487	0.00813008	0.0184638	0.440327	23
Melaleuca citrina (Curtis) Dum.Cours.	Perennial shrub	Exótica	573	912	0.122593	0.0345769	3.54552	2
Nerium oleander L.	Perennial shrub	Exótica	84	1341	0.0179718	0.0508417	0.353485	25
Nicotiana glauca Graham	Perennial shrub	Exótica	444	3163	0.0949936	0.11992	0.792144	16
Oenothera elata Kunth	Biennial herb	Nativa	81	819	0.0173299	0.031051	0.558112	21
Opuntia robusta Pfeiff.	Perennial cactus	Nativa	53	89	0.0113393	0.00337428	3.36052	3
Pittocaulon praecox (Cav.) H.Rob. & Brettell	Deciduous shrub	Nativa	318	598	0.0680359	0.0226721	3.00086	4
Prunus domestica L.	Deciduous tree	Exótica	68	606	0.0145486	0.0229754	0.633223	17
Prunus persica (L.) Stokes	Deciduous tree	Exótica	172	547	0.0367993	0.0207386	1.77444	9
Prunus serotina Ehrh.	Deciduous tree	Nativa	151	1383	0.0323064	0.052434	0.616134	19
Psittacanthus calyculatus G.Don	Hemiparasitic plant	Nativa	562	3275	0.12024	0.124166	0.968379	13
Punica granatum L.	Perennial shrub	Exótica	134	524	0.0286692	0.0198665	1.44309	11
Pyrus communis L.	Perennial tree	Exótica	48	758	0.0102696	0.0287382	0.357349	24
Rubus ulmifolius Schott	Perennial shrub	Exótica	55	497	0.0117672	0.0188429	0.624491	18
Tecoma stans (L.) Kunth	Perennial shrub	Nativa	306	389	0.0654685	0.0147483	4.43907	1
Tulbaghia violacea Harv.	Perennial herb	Exótica	40	997	0.00855798	0.0377995	0.226405	27
Verbascum virgatum Stokes	Biennial herb	Exótica	55	644	0.0117672	0.0244161	0.481945	22
		Total visits	4674	26376

## Sheet: Interaction matrix
	Abu pic	Bou ter	Cit ret	Cro x Cro	Cyd obl	Cyl im	Gre rob	Imp bal	Jac mim	Jas gra	Kni lin	Mal dom	Mel cit	Ner ole	Nic gla	Oen ela	Opu rob	Pit para	Pru dom	Prun per	Pru ser	Psit cals	Pun gra	Pyr com	Rub ulm	Tec sta	Tul viol	Ver virg
Amazilia beryllina	21	47	14	11	17	0	129	19	33	42	37	0	159	17	40	0	0	40	10	40	19	58	29	0	0	52	0	15
Leucolia violiceps	0	19	0	0	0	0	12	0	21	0	20	0	28	8	36	0	0	34	16	20	12	66	20	0	0	38	0	0
Archilochus colubris	0	39	0	5	0	0	2	8	11	0	8	0	23	8	50	18	0	18	6	22	9	36	17	6	13	38	10	0
Selasphorus heloisa	0	21	0	0	0	0	3	0	9	0	0	6	31	0	32	0	8	20	0	0	20	22	0	16	6	0	9	0
Calothorax lucifer	0	50	0	0	0	27	8	0	11	0	0	0	18	0	24	0	28	76	0	0	32	78	0	0	0	29	0	0
Cynanthus latirostris	0	69	0	19	12	8	39	11	26	28	15	12	59	11	72	21	11	32	16	36	38	86	18	15	11	46	0	9
Basilinna leucotis	19	183	5	24	31	13	59	28	38	57	42	20	172	31	116	38	6	56	20	54	21	118	35	11	25	68	21	31
Lampornis clemenciae	9	41	0	0	0	0	33	0	15	10	14	0	83	9	74	4	0	42	0	0	0	98	15	0	0	35	0	0
